# Supplementary material
Source: PubMed Central journal article supplement (PMC6235032)
Supplement: rspb20181842supp1.pdf [file rspb20181842supp1.pdf]

## Supplementary material

Tropical tree diversity mediates foraging and predatory effects of insectivorous birds  
Colleen S. Nell, Luis Abdala-Roberts, Victor Parra-Tabla, Kailen A. Mooney  
Proceedings of the Royal Society B  
DOI: 10.1098/rspb.2018.1842

correspondence to: [coll.s.nell@gmail.com](mailto:coll.s.nell@gmail.com)



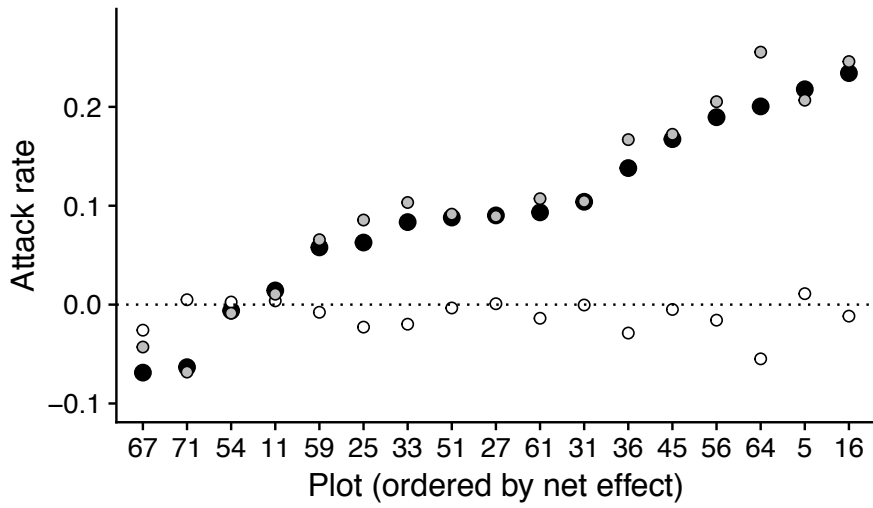

**Figure S2**

The net effect of tree diversity on model attack rate for each polyculture plot ( $n = 17$ , black fill) based upon tree-level attack rates. The net effect is the difference between attack rates in polyculture and the average attack rates for component tree species in monoculture. This net effect is decomposed into selection (white fill) and complementarity effects (grey fill).

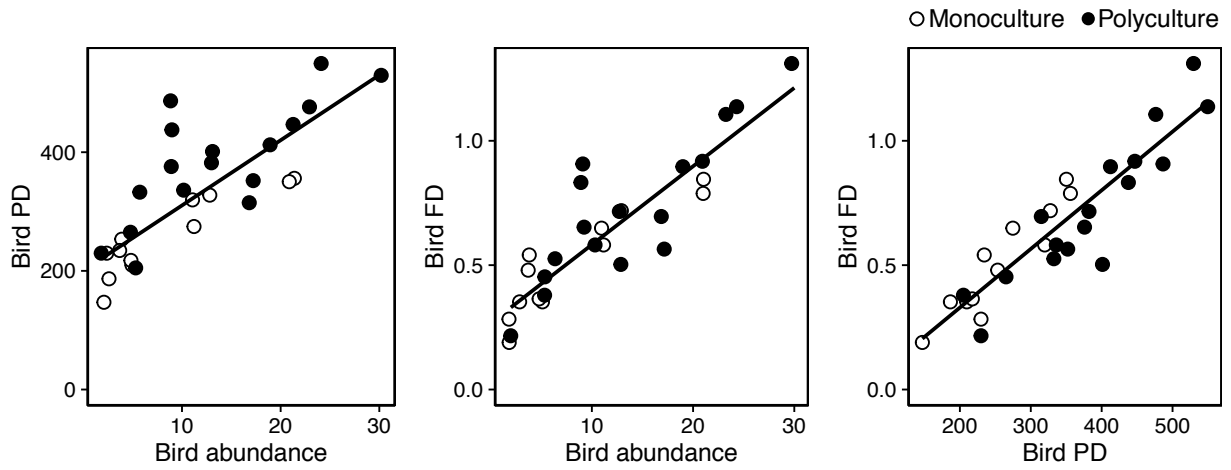

**Fig S3**

Bi-variate relationships between plot-level bird abundance and PD ( $R^2 = 0.64$ ,  $P < 0.001$ ), abundance and FD ( $R^2 = 0.79$ ,  $P < 0.001$ ) and PD and FD ( $R^2 = 0.82$ ,  $P < 0.001$ ). Monoculture plots are indicated with open circles and polycultures are filled circles. Axis units are the same as in Fig. 2.

**Table S1.** List of bird species and species-level foraging attributes used to calculate functional diversity. Dietary traits were used to subset insect-eating species (Category = Invert, % Invert > 0), and functional diversity was calculated based on the primary period of activity (0 = diurnal, 1 = nocturnal), body mass, and time spent foraging in forest strata. Taxonomic names follow the Birdlife world list V3. Bird traits are sourced from Wilman *et al.* (2014).

| Scientific name                               | Diet       |          | Period<br>of<br>activity | Mass<br>(mg) | Percent of time spent in foraging strata |            |          |        |        |
|-----------------------------------------------|------------|----------|--------------------------|--------------|------------------------------------------|------------|----------|--------|--------|
|                                               | Category   | % Invert |                          |              | Ground                                   | Understory | Mid-high | Canopy | Aerial |
| <i>Amazilia rutila</i>                        | Fruit/Nect | 10       | 0                        | 5.2          | 0                                        | 20         | 70       | 10     | 0      |
| <i>Arremonops rufivirgatus</i>                | Omnivore   | 40       | 0                        | 22.4         | 80                                       | 20         | 0        | 0      | 0      |
| <i>Buteo magnirostris</i>                     | Vert/Scav  | 40       | 0                        | 269.0        | 33                                       | 33         | 33       | 0      | 0      |
| <i>Camptostoma imberbe</i>                    | Invert     | 70       | 0                        | 7.4          | 0                                        | 20         | 30       | 50     | 0      |
| <i>Caprimulgus badius</i>                     | Invert     | 100      | 1                        | 59.8         | 0                                        | 10         | 80       | 10     | 0      |
| <i>Columbina passerina</i>                    | Omnivore   | 10       | 0                        | 35.4         | 100                                      | 0          | 0        | 0      | 0      |
| <i>Columbina talpacoti</i>                    | Plant/Seed | 10       | 0                        | 46.0         | 100                                      | 0          | 0        | 0      | 0      |
| <i>Contopus cinereus</i>                      | Invert     | 100      | 0                        | 11.6         | 0                                        | 30         | 70       | 0      | 0      |
| <i>Cyanocompsa parcellina</i>                 | Fruit/Nect | 20       | 0                        | 15.6         | 20                                       | 80         | 0        | 0      | 0      |
| <i>Cyanocorax yncas</i>                       | Omnivore   | 40       | 0                        | 78.5         | 0                                        | 70         | 30       | 0      | 0      |
| <i>Cyanocorax yucatanicus</i>                 | Omnivore   | 40       | 0                        | 118.0        | 30                                       | 30         | 20       | 20     | 0      |
| <i>Cyclarhis gujanensis</i>                   | Invert     | 100      | 0                        | 28.8         | 0                                        | 40         | 40       | 20     | 0      |
| <i>Dendroica dominica</i>                     | Invert     | 100      | 0                        | 9.7          | 0                                        | 0          | 20       | 80     | 0      |
| <i>Dives dives</i>                            | Invert     | 100      | 0                        | 91.3         | 80                                       | 10         | 10       | 0      | 0      |
| <i>Eumomota superciliosa</i>                  | Invert     | 70       | 0                        | 62.5         | 20                                       | 10         | 60       | 0      | 10     |
| <i>Icterus gularis</i>                        | Invert     | 70       | 0                        | 55.2         | 0                                        | 40         | 40       | 20     | 0      |
| <i>Icterus spurius</i>                        | Omnivore   | 40       | 0                        | 19.4         | 30                                       | 50         | 20       | 0      | 0      |
| <i>Leptotila verreauxi</i>                    | Plant/Seed | 20       | 0                        | 146.8        | 100                                      | 0          | 0        | 0      | 0      |
| <i>Megarynchus pitangua</i>                   | Invert     | 70       | 0                        | 69.9         | 0                                        | 10         | 50       | 40     | 0      |
| <i>Melanerpes aurifrons</i>                   | Omnivore   | 40       | 0                        | 80.8         | 20                                       | 20         | 60       | 0      | 0      |
| <i>Melanoptila glabrirostris</i>              | Invert     | 60       | 0                        | 35.4         | 0                                        | 100        | 0        | 0      | 0      |
| <i>Momotus momota ssp.</i><br><i>lessonii</i> | Omnivore   | 50       | 0                        | 114.9        | 30                                       | 30         | 30       | 10     | 0      |
| <i>Myiarchus tuberculifer</i>                 | Invert     | 80       | 0                        | 17.7         | 0                                        | 33         | 33       | 33     | 0      |
| <i>Myiarchus tyrannulus</i>                   | Invert     | 70       | 0                        | 35.5         | 20                                       | 80         | 0        | 0      | 0      |
| <i>Myiozetetes similis</i>                    | Omnivore   | 40       | 0                        | 28.0         | 20                                       | 20         | 40       | 20     | 0      |
| <i>Nyctidromus albicollis</i>                 | Invert     | 100      | 1                        | 57.8         | 40                                       | 30         | 20       | 0      | 10     |

|                                 |            |     |   |       |     |     |     |    |   |
|---------------------------------|------------|-----|---|-------|-----|-----|-----|----|---|
| <i>Pachyramphus aglaiae</i>     | Omnivore   | 50  | 0 | 29.7  | 0   | 50  | 50  | 0  | 0 |
| <i>Pachyramphus major</i>       | Omnivore   | 50  | 0 | 24.8  | 0   | 0   | 100 | 0  | 0 |
| <i>Piaya cayana</i>             | Invert     | 100 | 0 | 101.9 | 0   | 0   | 20  | 80 | 0 |
| <i>Pitangus sulphuratus</i>     | Omnivore   | 40  | 0 | 62.9  | 50  | 40  | 10  | 0  | 0 |
| <i>Polioptila caerulea</i>      | Invert     | 100 | 0 | 5.8   | 0   | 50  | 50  | 0  | 0 |
| <i>Quiscalus mexicanus</i>      | Invert     | 80  | 0 | 160.5 | 80  | 10  | 10  | 0  | 0 |
| <i>Rostrhamus sociabilis</i>    | Invert     | 100 | 0 | 366.9 | 100 | 0   | 0   | 0  | 0 |
| <i>Saltator atriceps</i>        | Invert     | 60  | 0 | 83.8  | 0   | 40  | 60  | 0  | 0 |
| <i>Saltator coerulescens</i>    | Invert     | 100 | 0 | 54.9  | 0   | 70  | 30  | 0  | 0 |
| <i>Seiurus aurocapilla</i>      | Invert     | 70  | 0 | 18.8  | 80  | 20  | 0   | 0  | 0 |
| <i>Thryothorus maculipectus</i> | Invert     | 100 | 0 | 15.0  | 0   | 100 | 0   | 0  | 0 |
| <i>Tolmomyias sulphurescens</i> | Invert     | 90  | 0 | 14.3  | 0   | 30  | 70  | 0  | 0 |
| <i>Trogon melanocephalus</i>    | Omnivore   | 50  | 0 | 85.1  | 0   | 20  | 70  | 10 | 0 |
| <i>Turdus grayi</i>             | Fruit/Nect | 30  | 0 | 79.5  | 0   | 20  | 80  | 0  | 0 |
| <i>Tyrannus couchii</i>         | Invert     | 80  | 0 | 39.0  | 0   | 0   | 100 | 0  | 0 |
| <i>Tyrannus melancholicus</i>   | Invert     | 100 | 0 | 37.4  | 0   | 0   | 50  | 50 | 0 |
| <i>Uropsila leucogastra</i>     | Invert     | 100 | 0 | 9.0   | 33  | 33  | 33  | 0  | 0 |
| <i>Vireo griseus</i>            | Invert     | 70  | 0 | 11.4  | 0   | 40  | 40  | 20 | 0 |
